# Supplementary material
Source: HighWire-hosted journal article supplement (https://gut.bmj.com/content/67/1/138)
Supplement: inline-supplementary-material-2 [file inline-supplementary-material-2.pdf]

**Supplementary Table 2:  $\beta$ -Coefficient of potential risk factors for the number of pancreatic cysts unadjusted and adjusted for age**

| risk factor     | unadjusted     |                |       | adjusted for age and BMI |               |       |
|-----------------|----------------|----------------|-------|--------------------------|---------------|-------|
|                 | $\beta$ -Coef. | CI 95%         | p     | $\beta$ -Coef.           | CI 95%        | p     |
| <b>BMI</b>      | 0.031          | -0.065; 0.127  | 0.534 | -0.009                   | -0.120; 0.102 | 0.874 |
| <b>alcohol</b>  | -0.047         | -0.081; -0.012 | 0.009 | -0.024                   | -0.049; 0.000 | 0.054 |
| <b>smoking</b>  |                |                |       |                          |               |       |
| <b>former</b>   | -0.341         | -1.866; 1.172  | 0.661 | -0.494                   | -1.988; 1.001 | 0.517 |
| <b>current</b>  | -1.445         | -2.925; 0.036  | 0.056 | -0.602                   | -2.042; 0.837 | 0.412 |
| <b>lipase</b>   | 0.138          | -0.200; 0.475  | 0.424 | 0.057                    | -0.277; 0.391 | 0.738 |
| <b>HbA1c</b>    | 0.769          | -0.081; 1.621  | 0.076 | 0.442                    | -0.320; 1.204 | 0.256 |
| <b>diabetes</b> | 1.761          | -0.285; 3.807  | 0.092 | 0.745                    | -1.502; 2.991 | 0.515 |

*CI confidence interval*
